# Supplementary material for: Detection of Nipah virus in Pteropus medius in 2019 outbreak from Ernakulam district, Kerala, India
Source: BMC Infect Dis. 2021 Feb 9;21:162. doi: 10.1186/s12879-021-05865-7 (PMC7871573; doi:10.1186/s12879-021-05865-7)
Supplement: Supplementary file 3 — Additional file 3: Supplementary Table 2. Mutation present in Indian NiV, 2019 outbreak compared to Bangladesh sequences. [file 12879_2021_5865_MOESM3_ESM.xls]

## Sheet: Sequence Data
Supplementary Table 2: Mutation present in Indian NiV, 2019 outbreak compared to Bangladesh sequences.
	N						P
	152	188	211	503	505	520	594	614	752	758	761	809	818	820	830	833	843	844	845	900	919	921	954	958	982	991	1162	1188	1216
AY988601.1 NiV/Bangladesh/HU/2004/RA1	G	D	Q	S	K	P	G	T	E	Q	R	G	H	I	Q	G	G	P	K	G	T	N	P	S	Q	E	A	M	G
MK575066.1 NiV/BD/P.medius/EHA/2013/Raypur1408	.	E	.	.	.	.	R	A	.	.	.	.	.	.	.	D	.	.	R	.	.	.	.	.	.	.	.	V	.
FJ513078.1 NiV/India/HU/2007/FG	.	E	R	.	.	.	.	.	.	.	K	S	R	.	.	.	R	.	.	.	.	.	.	.	.	.	.	.	.
MH396625.1 NiV/India/HU/2018	.	E	.	N	R	S	.	.	G	E	.	.	.	L	K	.	.	L	.	S	N	D	L	N	R	.	T	.	D
NiV/India/Bat/2019/572-5	S	E	.	N	R	S	.	.	G	E	.	.	.	L	.	.	.	L	.	S	N	D	.	.	R	G	T	.	D
	M	F				G										L
	1256	1611	1615	1803	1848	2278	2431	2447	2487	2519	2527	2529	2566	2570	2641	2840	2858	3378	3379	3385	3388	3404	3411	4008	4494	4696	4783
AY988601.1 NiV/Bangladesh/HU/2004/RA1	M	I	M	S	G	T	N	I	K	K	I	E	N	V	K	T	R	S	V	D	Y	Y	I	K	V	E	D
MK575066.1 NiV/BD/P.medius/EHA/2013/Raypur1408	.	.	.	L	D	.	.	.	.	T	.	.	.	.	.	.	.	.	M	.	N	.	.	.	I	.	.
FJ513078.1 NiV/India/HU/2007/FG	I	.	I	L	D	.	.	V	.	.	.	.	.	.	.	I	K	N	.	N	.	.	T	.	I	.	.
MH396625.1 NiV/India/HU/2018	.	L	.	L	D	.	S	.	M	.	V	K	.	I	T	.	K	N	.	N	.	.	T	R	I	.	N
NiV/India/Bat/2019/572-5	.	L	.	L	D	A	S	.	M	.	V	K	D	I	T	.	K	N	.	N	.	H	T	R	I	G	N
