# Supplementary material for: Detection of Nipah virus in Pteropus medius in 2019 outbreak from Ernakulam district, Kerala, India
Source: BMC Infect Dis. 2021 Feb 9;21:162. doi: 10.1186/s12879-021-05865-7 (PMC7871573; doi:10.1186/s12879-021-05865-7)
Supplement: Supplementary file 4 — Additional file 4: Supplementary Table 3. Nucleotide divergence for retrieved L gene sequences with respect to the L gene of of Nipah virus (Accession Number: AY988601.1). [file 12879_2021_5865_MOESM4_ESM.xls]

## Sheet: N gene
Nucleotide divergence for retrieved N gene sequences with respect to the N gene of of Nipah virus (Accession Number: AY988601.1)
	Genotype
MK575064.1 NiV/BD/P.medius/EHA/2013/Raypur1405	BD	0.00250156
MK575063.1 NiV/BD/P.medius/EHA/2013/Raypur1404	BD	0.00250156	0
MK575062.1 NiV/BD/P.medius/EHA/2013/Raypur1403	BD	0.00250156	0	0
MK575067.1 NiV/BD/P.medius/EHA/2013/Raypur1409	BD	0.00250156	0	0	0
MK575066.1 NiV/BD/P.medius/EHA/2013/Raypur1408	BD	0.00250156	0	0	0	0
MK575065.1 NiV/BD/P.medius/EHA/2013/Raypur1406	BD	0.00250156	0	0	0	0	0
JN808863.1 NIV/BD/2008/RAJBARI	BD	0.00625391	0.00625391	0.00625391	0.00625391	0.00625391	0.00625391	0.00625391
JN808857.1 NIV/BD/2008/MANIKGONJ	BD	0.00625391	0.00625391	0.00625391	0.00625391	0.00625391	0.00625391	0.00625391	0
MK575061.1 NiV/BD/P.medius/EHA/2013/Raypur1402	BD	0.00250156	0	0	0	0	0	0	0.00625391	0.00625391
MK575060.1 NiV/BD/P.medius/EHA/2013/Raypur1401	BD	0.00250156	0	0	0	0	0	0	0.00625391	0.00625391	0
JN808864.1 NIV/BD/2010/FARIDPUR	BD	0.00312695	0.000625391	0.000625391	0.000625391	0.000625391	0.000625391	0.000625391	0.0068793	0.0068793	0.000625391	0.000625391
MK575068.1 NiV/BD/P.medius/EHA/2013/Raypur1410	BD	0.00250156	0	0	0	0	0	0	0.00625391	0.00625391	0	0	0.000625391
MK575070.1 NiV/BD/P.medius/EHA/2013/Sylhet191	BD	0.00375235	0.00125078	0.00125078	0.00125078	0.00125078	0.00125078	0.00125078	0.00750469	0.00750469	0.00125078	0.00125078	0.00187617	0.00125078
MK575069.1 NiV/BD/P.medius/EHA/2013/Raypur1411	BD	0.00250156	0	0	0	0	0	0	0.00625391	0.00625391	0	0	0.000625391	0	0.00125078
MH396625.1 NiV/India/HU/2018	India	0.0125078	0.0125078	0.0125078	0.0125078	0.0125078	0.0125078	0.0125078	0.0137586	0.0137586	0.0125078	0.0125078	0.0131332	0.0125078	0.0137586	0.0125078
MH523640.1 NiV/India/HU/2018	India	0.0125078	0.0125078	0.0125078	0.0125078	0.0125078	0.0125078	0.0125078	0.0137586	0.0137586	0.0125078	0.0125078	0.0131332	0.0125078	0.0137586	0.0125078	0
MH523641.1 NiV/India/HU/2018	India	0.0125078	0.0125078	0.0125078	0.0125078	0.0125078	0.0125078	0.0125078	0.0137586	0.0137586	0.0125078	0.0125078	0.0131332	0.0125078	0.0137586	0.0125078	0	0
NiV/India/Bat/2019/572-9	India	0.0113182	0.011984	0.011984	0.011984	0.011984	0.011984	0.011984	0.0133156	0.0133156	0.011984	0.011984	0.0126498	0.011984	0.0126498	0.011984	0.00199734	0.00199734	0.00199734
NiV/India/Bat/2019/574-6	India	0.014384	0.014384	0.014384	0.014384	0.014384	0.014384	0.014384	0.0156348	0.0156348	0.014384	0.014384	0.0150094	0.014384	0.0156348	0.014384	0.00437774	0.00437774	0.00437774	0.00532623
NiV/India/Bat/2019/574-5	India	0.014384	0.014384	0.014384	0.014384	0.014384	0.014384	0.014384	0.0156348	0.0156348	0.014384	0.014384	0.0150094	0.014384	0.0156348	0.014384	0.00437774	0.00437774	0.00437774	0.00532623	0
NiV/India/Bat/2019/574-4	India	0.0150094	0.0150094	0.0150094	0.0150094	0.0150094	0.0150094	0.0150094	0.0162602	0.0162602	0.0150094	0.0150094	0.0156348	0.0150094	0.0162602	0.0150094	0.00500313	0.00500313	0.00500313	0.00599201	0.000625391	0.000625391
NiV/India/Bat/2019/572-10	India	0.0219987	0.0219987	0.0219987	0.0219987	0.0219987	0.0219987	0.0219987	0.0232558	0.0232558	0.0219987	0.0219987	0.0226273	0.0219987	0.0232558	0.0219987	0.0106851	0.0106851	0.0106851	0.00937082	0.0138278	0.0138278	0.0144563
NiV/India/Bat/2019/43/7	India	0.0187296	0.0179153	0.0179153	0.0179153	0.0179153	0.0179153	0.0179153	0.0203583	0.0203583	0.0179153	0.0179153	0.0187296	0.0179153	0.019544	0.0179153	0.00732899	0.00732899	0.00732899	0.00353669	0.0105863	0.0105863	0.0105863	0.00651466
NiV/India/Bat/2019/41/7	India	0.0131332	0.0131332	0.0131332	0.0131332	0.0131332	0.0131332	0.0131332	0.014384	0.014384	0.0131332	0.0131332	0.0137586	0.0131332	0.014384	0.0131332	0.00187617	0.00187617	0.00187617	0	0.00500313	0.00500313	0.00562852	0.0087995	0.00651466
NiV/India/Bat/2019/572-6	India	0.0182796	0.0182796	0.0182796	0.0182796	0.0182796	0.0182796	0.0182796	0.0193548	0.0193548	0.0182796	0.0182796	0.0193548	0.0182796	0.0193548	0.0182796	0.0107527	0.0107527	0.0107527	0.00967742	0.0107527	0.0107527	0.0107527	0.00967742	0.0118407	0.00967742
MH523642.1 NiV/India/HU/2018	India	0.0125078	0.0125078	0.0125078	0.0125078	0.0125078	0.0125078	0.0125078	0.0137586	0.0137586	0.0125078	0.0125078	0.0131332	0.0125078	0.0137586	0.0125078	0	0	0	0.00199734	0.00437774	0.00437774	0.00500313	0.0106851	0.00732899	0.00187617	0.0107527
NiV/India/Bat/2019/572-5	India	0.0131332	0.0131332	0.0131332	0.0131332	0.0131332	0.0131332	0.0131332	0.014384	0.014384	0.0131332	0.0131332	0.0137586	0.0131332	0.014384	0.0131332	0.00187617	0.00187617	0.00187617	0	0.00500313	0.00500313	0.00562852	0.0087995	0.00651466	0	0.00967742	0.00187617
FJ513078.1 NiV/India/HU/2007/FG	India	0.00562852	0.00562852	0.00562852	0.00562852	0.00562852	0.00562852	0.00562852	0.00437774	0.00437774	0.00562852	0.00562852	0.00625391	0.00562852	0.0068793	0.00562852	0.014384	0.014384	0.014384	0.0133156	0.0162602	0.0162602	0.0168856	0.0238843	0.0203583	0.0150094	0.0204301	0.014384	0.0150094
AF376747.1 NiV/MY/Pig/1999/VRI-0626	MY	0.057536	0.0569106	0.0569106	0.0569106	0.0569106	0.0569106	0.0569106	0.0569106	0.0569106	0.0569106	0.0569106	0.057536	0.0569106	0.0581614	0.0569106	0.0631645	0.0631645	0.0631645	0.0592543	0.0637899	0.0637899	0.0644153	0.071653	0.0724756	0.0625391	0.0645161	0.0631645	0.0625391	0.0600375
AJ627196.1 NV/MY/Pig/99/VRI-0626	MY	0.0587867	0.0581614	0.0581614	0.0581614	0.0581614	0.0581614	0.0581614	0.0581614	0.0581614	0.0581614	0.0581614	0.0587867	0.0581614	0.0594121	0.0581614	0.0644153	0.0644153	0.0644153	0.0605859	0.0650407	0.0650407	0.065666	0.0729101	0.0741042	0.0637899	0.0655914	0.0644153	0.0637899	0.0612883	0.00375235
AJ564622.1 NiV/MY/Pig/99/VRI-1413	MY	0.0569106	0.0562852	0.0562852	0.0562852	0.0562852	0.0562852	0.0562852	0.0562852	0.0562852	0.0562852	0.0562852	0.0569106	0.0562852	0.057536	0.0562852	0.0625391	0.0625391	0.0625391	0.0585885	0.0631645	0.0631645	0.0637899	0.0710245	0.0724756	0.0619137	0.0645161	0.0625391	0.0619137	0.0594121	0.000625391	0.00312695
AJ564621.1 NV/MY/Pig/99/VRI-2794	MY	0.0569106	0.0562852	0.0562852	0.0562852	0.0562852	0.0562852	0.0562852	0.0562852	0.0562852	0.0562852	0.0562852	0.0569106	0.0562852	0.057536	0.0562852	0.0625391	0.0625391	0.0625391	0.0585885	0.0631645	0.0631645	0.0637899	0.0710245	0.0724756	0.0619137	0.0645161	0.0625391	0.0619137	0.0594121	0.000625391	0.00312695	0
AJ564623.1 NiV/MY/Pig/99/UM-0128	MY	0.0569106	0.0562852	0.0562852	0.0562852	0.0562852	0.0562852	0.0562852	0.0562852	0.0562852	0.0562852	0.0562852	0.0569106	0.0562852	0.057536	0.0562852	0.0625391	0.0625391	0.0625391	0.0585885	0.0631645	0.0631645	0.0637899	0.0710245	0.0724756	0.0619137	0.0645161	0.0625391	0.0619137	0.0594121	0.000625391	0.00312695	0	0
AY029767.1 NiV/MY/HU/1999/UMMC1	MY	0.0569106	0.0562852	0.0562852	0.0562852	0.0562852	0.0562852	0.0562852	0.0562852	0.0562852	0.0562852	0.0562852	0.0569106	0.0562852	0.057536	0.0562852	0.0625391	0.0625391	0.0625391	0.0585885	0.0631645	0.0631645	0.0637899	0.0710245	0.0724756	0.0619137	0.0645161	0.0625391	0.0619137	0.0594121	0.000625391	0.00312695	0	0	0
KY425655.1 NiV/MY/HU/IRF0158	MY	0.0569106	0.0562852	0.0562852	0.0562852	0.0562852	0.0562852	0.0562852	0.0562852	0.0562852	0.0562852	0.0562852	0.0569106	0.0562852	0.057536	0.0562852	0.0625391	0.0625391	0.0625391	0.0585885	0.0631645	0.0631645	0.0637899	0.0710245	0.0724756	0.0619137	0.0645161	0.0625391	0.0619137	0.0594121	0.000625391	0.00312695	0	0	0	0
NC 002728.1 NiV/MY/HU/1999/CDC	MY	0.0569106	0.0562852	0.0562852	0.0562852	0.0562852	0.0562852	0.0562852	0.0562852	0.0562852	0.0562852	0.0562852	0.0569106	0.0562852	0.057536	0.0562852	0.0625391	0.0625391	0.0625391	0.0585885	0.0631645	0.0631645	0.0637899	0.0710245	0.0724756	0.0619137	0.0645161	0.0625391	0.0619137	0.0594121	0.000625391	0.00312695	0	0	0	0	0
KY425646.1 NiV/MY/HU/1999/IRF0160	MY	0.0569106	0.0562852	0.0562852	0.0562852	0.0562852	0.0562852	0.0562852	0.0562852	0.0562852	0.0562852	0.0562852	0.0569106	0.0562852	0.057536	0.0562852	0.0625391	0.0625391	0.0625391	0.0585885	0.0631645	0.0631645	0.0637899	0.0710245	0.0724756	0.0619137	0.0645161	0.0625391	0.0619137	0.0594121	0.000625391	0.00312695	0	0	0	0	0	0
AY029768.1 NiV/MY/HU/1999/UMMC2	MY	0.0569106	0.0562852	0.0562852	0.0562852	0.0562852	0.0562852	0.0562852	0.0562852	0.0562852	0.0562852	0.0562852	0.0569106	0.0562852	0.057536	0.0562852	0.0625391	0.0625391	0.0625391	0.0585885	0.0631645	0.0631645	0.0637899	0.0710245	0.0724756	0.0619137	0.0645161	0.0625391	0.0619137	0.0594121	0.000625391	0.00312695	0	0	0	0	0	0	0
FN869553 NiV/MY/Bat/2008/Perek	MY	0.0562852	0.0556598	0.0556598	0.0556598	0.0556598	0.0556598	0.0556598	0.0556598	0.0556598	0.0556598	0.0556598	0.0562852	0.0556598	0.0569106	0.0556598	0.0619137	0.0619137	0.0619137	0.0579228	0.0625391	0.0625391	0.0631645	0.070396	0.0708469	0.0612883	0.0612903	0.0619137	0.0612883	0.0587867	0.00750469	0.00875547	0.0068793	0.0068793	0.0068793	0.0068793	0.0068793	0.0068793	0.0068793	0.0068793

## Sheet: P gene
Nucleotide divergence for retrieved P gene sequences with respect to the P gene of of Nipah virus (Accession Number: AY988601.1)
	Genotype
MK575064.1 NiV/BD/P.medius/EHA/2013/Raypur1405	BD	0.00751174
MK575063.1 NiV/BD/P.medius/EHA/2013/Raypur1404	BD	0.00798122	0.000469484
MK575062.1 NiV/BD/P.medius/EHA/2013/Raypur1403	BD	0.00798122	0.000469484	0.000938967
MK575067.1 NiV/BD/P.medius/EHA/2013/Raypur1409	BD	0.0084507	0.000938967	0.00140845	0.00140845
MK575066.1 NiV/BD/P.medius/EHA/2013/Raypur1408	BD	0.00751174	0	0.000469484	0.000469484	0.000938967
MK575065.1 NiV/BD/P.medius/EHA/2013/Raypur1406	BD	0.00751174	0	0.000469484	0.000469484	0.000938967	0
JN808863.1 NIV/BD/2008/RAJBARI	BD	0.00657277	0.0131455	0.013615	0.013615	0.0140845	0.0131455	0.0131455
JN808857.1 NIV/BD/2008/MANIKGONJ	BD	0.00657277	0.0131455	0.013615	0.013615	0.0140845	0.0131455	0.0131455	0
MK575061.1 NiV/BD/P.medius/EHA/2013/Raypur1402	BD	0.00798122	0.000469484	0.000938967	0.000938967	0.00140845	0.000469484	0.000469484	0.013615	0.013615
MK575060.1 NiV/BD/P.medius/EHA/2013/Raypur1401	BD	0.00751174	0	0.000469484	0.000469484	0.000938967	0	0	0.0131455	0.0131455	0.000469484
JN808864.1 NIV/BD/2010/FARIDPUR	BD	0.00422535	0.00328638	0.00375587	0.00375587	0.00422535	0.00328638	0.00328638	0.00985915	0.00985915	0.00375587	0.00328638
MK575068.1 NiV/BD/P.medius/EHA/2013/Raypur1410	BD	0.00798122	0.000469484	0.000938967	0.000938967	0.00140845	0.000469484	0.000469484	0.013615	0.013615	0.000938967	0.000469484	0.00375587
MK575070.1 NiV/BD/P.medius/EHA/2013/Sylhet191	BD	0.00751174	0	0.000469484	0.000469484	0.000938967	0	0	0.0131455	0.0131455	0.000469484	0	0.00328638	0.000469484
MK575069.1 NiV/BD/P.medius/EHA/2013/Raypur1411	BD	0.00751174	0	0.000469484	0.000469484	0.000938967	0	0	0.0131455	0.0131455	0.000469484	0	0.00328638	0.000469484	0
MH396625.1 NiV/India/HU/2018	India	0.0178404	0.0253521	0.0258216	0.0258216	0.0262911	0.0253521	0.0253521	0.0225352	0.0225352	0.0258216	0.0253521	0.0220657	0.0258216	0.0253521	0.0253521
MH523640.1 NiV/India/HU/2018	India	0.0178404	0.0253521	0.0258216	0.0258216	0.0262911	0.0253521	0.0253521	0.0225352	0.0225352	0.0258216	0.0253521	0.0220657	0.0258216	0.0253521	0.0253521	0
MH523641.1 NiV/India/HU/2018	India	0.0178404	0.0253521	0.0258216	0.0258216	0.0262911	0.0253521	0.0253521	0.0225352	0.0225352	0.0258216	0.0253521	0.0220657	0.0258216	0.0253521	0.0253521	0	0
NiV/India/Bat/2019/572-9	India	0.0173709	0.0248826	0.0253521	0.0253521	0.0258216	0.0248826	0.0248826	0.0220657	0.0220657	0.0253521	0.0248826	0.0215962	0.0253521	0.0248826	0.0248826	0.00328638	0.00328638	0.00328638
NiV/India/Bat/2019/574-6	India	0.0183099	0.0248826	0.0253521	0.0253521	0.0258216	0.0248826	0.0248826	0.0230047	0.0230047	0.0253521	0.0248826	0.0215962	0.0253521	0.0248826	0.0248826	0.00516432	0.00516432	0.00516432	0.00469484
NiV/India/Bat/2019/574-5	India	0.0187793	0.0253521	0.0258216	0.0258216	0.0262911	0.0253521	0.0253521	0.0234742	0.0234742	0.0258216	0.0253521	0.0220657	0.0258216	0.0253521	0.0253521	0.00469484	0.00469484	0.00469484	0.00422535	0.000469484
NiV/India/Bat/2019/574-4	India	0.0187793	0.0253521	0.0258216	0.0258216	0.0262911	0.0253521	0.0253521	0.0234742	0.0234742	0.0258216	0.0253521	0.0220657	0.0258216	0.0253521	0.0253521	0.00469484	0.00469484	0.00469484	0.00422535	0.000469484	0
NiV/India/Bat/2019/572-10	India	0.0173709	0.0248826	0.0253521	0.0253521	0.0258216	0.0248826	0.0248826	0.0220657	0.0220657	0.0253521	0.0248826	0.0215962	0.0253521	0.0248826	0.0248826	0.00422535	0.00422535	0.00422535	0.000938967	0.0056338	0.00516432	0.00516432
NiV/India/Bat/2019/43/7	India	0.0183099	0.0258216	0.0262911	0.0262911	0.0267606	0.0258216	0.0258216	0.0230047	0.0230047	0.0262911	0.0258216	0.0225352	0.0262911	0.0258216	0.0258216	0.00610329	0.00610329	0.00610329	0.0028169	0.0056338	0.00610329	0.00610329	0.00187793
NiV/India/Bat/2019/41/7	India	0.0169014	0.0244131	0.0248826	0.0248826	0.0253521	0.0244131	0.0244131	0.0215962	0.0215962	0.0248826	0.0244131	0.0211268	0.0248826	0.0244131	0.0244131	0.00469484	0.00469484	0.00469484	0.00140845	0.00516432	0.0056338	0.0056338	0.000469484	0.00140845
NiV/India/Bat/2019/572-6	India	0.0175272	0.0251066	0.0255803	0.0255803	0.026054	0.0251066	0.0251066	0.0222643	0.0222643	0.0255803	0.0251066	0.0217906	0.0255803	0.0251066	0.0251066	0.0052108	0.0052108	0.0052108	0.00189484	0.00568451	0.00615822	0.00615822	0.000947418	0.00189484	0.000473709
MH523642.1 NiV/India/HU/2018	India	0.0183099	0.0258216	0.0262911	0.0262911	0.0267606	0.0258216	0.0258216	0.0230047	0.0230047	0.0262911	0.0258216	0.0225352	0.0262911	0.0258216	0.0258216	0.000469484	0.000469484	0.000469484	0.00375587	0.0056338	0.00516432	0.00516432	0.00469484	0.00657277	0.00516432	0.00568451
NiV/India/Bat/2019/572-5	India	0.0169014	0.0244131	0.0248826	0.0248826	0.0253521	0.0244131	0.0244131	0.0215962	0.0215962	0.0248826	0.0244131	0.0211268	0.0248826	0.0244131	0.0244131	0.00469484	0.00469484	0.00469484	0.00140845	0.00516432	0.0056338	0.0056338	0.000469484	0.00140845	0	0.000473709	0.00516432
FJ513078.1 NiV/India/HU/2007/FG	India	0.00516432	0.0126761	0.0131455	0.0131455	0.013615	0.0126761	0.0126761	0.00516432	0.00516432	0.0131455	0.0126761	0.00938967	0.0131455	0.0126761	0.0126761	0.0220657	0.0220657	0.0220657	0.0215962	0.0225352	0.0230047	0.0230047	0.0215962	0.0225352	0.0211268	0.0217906	0.0225352	0.0211268
AF376747.1 NiV/MY/Pig/1999/VRI-0626	MY	0.0807512	0.0873239	0.0877934	0.0877934	0.0882629	0.0873239	0.0873239	0.084507	0.084507	0.0877934	0.0873239	0.0849765	0.0877934	0.0873239	0.0873239	0.085446	0.085446	0.085446	0.0849765	0.0859155	0.086385	0.086385	0.0849765	0.0859155	0.084507	0.0852676	0.0859155	0.084507	0.0835681
AJ627196.1 NV/MY/Pig/99/VRI-0626	MY	0.0807512	0.0873239	0.0877934	0.0877934	0.0882629	0.0873239	0.0873239	0.084507	0.084507	0.0877934	0.0873239	0.0849765	0.0877934	0.0873239	0.0873239	0.085446	0.085446	0.085446	0.0849765	0.0859155	0.086385	0.086385	0.0849765	0.0859155	0.084507	0.0852676	0.0859155	0.084507	0.0835681	0.0028169
AJ564622.1 NiV/MY/Pig/99/VRI-1413	MY	0.0802817	0.0868545	0.0873239	0.0873239	0.0877934	0.0868545	0.0868545	0.0840376	0.0840376	0.0873239	0.0868545	0.084507	0.0873239	0.0868545	0.0868545	0.0849765	0.0849765	0.0849765	0.084507	0.085446	0.0859155	0.0859155	0.084507	0.085446	0.0840376	0.0847939	0.085446	0.0840376	0.0830986	0.000469484	0.00234742
AJ564621.1 NV/MY/Pig/99/VRI-2794	MY	0.0802817	0.0868545	0.0873239	0.0873239	0.0877934	0.0868545	0.0868545	0.0840376	0.0840376	0.0873239	0.0868545	0.084507	0.0873239	0.0868545	0.0868545	0.0849765	0.0849765	0.0849765	0.084507	0.085446	0.0859155	0.0859155	0.084507	0.085446	0.0840376	0.0847939	0.085446	0.0840376	0.0830986	0.000469484	0.00234742	0
AJ564623.1 NiV/MY/Pig/99/UM-0128	MY	0.0802817	0.0868545	0.0873239	0.0873239	0.0877934	0.0868545	0.0868545	0.0840376	0.0840376	0.0873239	0.0868545	0.084507	0.0873239	0.0868545	0.0868545	0.0849765	0.0849765	0.0849765	0.084507	0.085446	0.0859155	0.0859155	0.084507	0.085446	0.0840376	0.0847939	0.085446	0.0840376	0.0830986	0.000469484	0.00234742	0	0
AY029767.1 NiV/MY/HU/1999/UMMC1	MY	0.0802817	0.0868545	0.0873239	0.0873239	0.0877934	0.0868545	0.0868545	0.0840376	0.0840376	0.0873239	0.0868545	0.084507	0.0873239	0.0868545	0.0868545	0.0849765	0.0849765	0.0849765	0.084507	0.085446	0.0859155	0.0859155	0.084507	0.085446	0.0840376	0.0847939	0.085446	0.0840376	0.0830986	0.000469484	0.00234742	0	0	0
KY425655.1 NiV/MY/HU/IRF0158	MY	0.0802817	0.0868545	0.0873239	0.0873239	0.0877934	0.0868545	0.0868545	0.0840376	0.0840376	0.0873239	0.0868545	0.084507	0.0873239	0.0868545	0.0868545	0.0849765	0.0849765	0.0849765	0.084507	0.085446	0.0859155	0.0859155	0.084507	0.085446	0.0840376	0.0847939	0.085446	0.0840376	0.0830986	0.000469484	0.00234742	0	0	0	0
NC 002728.1 NiV/MY/HU/1999/CDC	MY	0.0802817	0.0868545	0.0873239	0.0873239	0.0877934	0.0868545	0.0868545	0.0840376	0.0840376	0.0873239	0.0868545	0.084507	0.0873239	0.0868545	0.0868545	0.0849765	0.0849765	0.0849765	0.084507	0.085446	0.0859155	0.0859155	0.084507	0.085446	0.0840376	0.0847939	0.085446	0.0840376	0.0830986	0.000469484	0.00234742	0	0	0	0	0
KY425646.1 NiV/MY/HU/1999/IRF0160	MY	0.0802817	0.0868545	0.0873239	0.0873239	0.0877934	0.0868545	0.0868545	0.0840376	0.0840376	0.0873239	0.0868545	0.084507	0.0873239	0.0868545	0.0868545	0.0849765	0.0849765	0.0849765	0.084507	0.085446	0.0859155	0.0859155	0.084507	0.085446	0.0840376	0.0847939	0.085446	0.0840376	0.0830986	0.000469484	0.00234742	0	0	0	0	0	0
AY029768.1 NiV/MY/HU/1999/UMMC2	MY	0.0802817	0.0868545	0.0873239	0.0873239	0.0877934	0.0868545	0.0868545	0.0840376	0.0840376	0.0873239	0.0868545	0.084507	0.0873239	0.0868545	0.0868545	0.0849765	0.0849765	0.0849765	0.084507	0.085446	0.0859155	0.0859155	0.084507	0.085446	0.0840376	0.0847939	0.085446	0.0840376	0.0830986	0.000469484	0.00234742	0	0	0	0	0	0	0
FN869553 NiV/MY/Bat/2008/Perek	MY	0.0873239	0.0938967	0.0943662	0.0943662	0.0948357	0.0938967	0.0938967	0.0910798	0.0910798	0.0943662	0.0938967	0.0915493	0.0943662	0.0938967	0.0938967	0.0929577	0.0929577	0.0929577	0.0924883	0.0934272	0.0938967	0.0938967	0.0924883	0.0934272	0.0920188	0.092847	0.0934272	0.0920188	0.0906103	0.0220657	0.0220657	0.0215962	0.0215962	0.0215962	0.0215962	0.0215962	0.0215962	0.0215962	0.0215962

## Sheet: M gene
Nucleotide divergence for retrieved M gene sequences with respect to the M gene of of Nipah virus (Accession Number: AY988601.1)
	Genotype
MK575064.1 NiV/BD/P.medius/EHA/2013/Raypur1405	BD	0
MK575063.1 NiV/BD/P.medius/EHA/2013/Raypur1404	BD	0	0
MK575062.1 NiV/BD/P.medius/EHA/2013/Raypur1403	BD	0	0	0
MK575067.1 NiV/BD/P.medius/EHA/2013/Raypur1409	BD	0	0	0	0
MK575066.1 NiV/BD/P.medius/EHA/2013/Raypur1408	BD	0	0	0	0	0
MK575065.1 NiV/BD/P.medius/EHA/2013/Raypur1406	BD	0	0	0	0	0	0
JN808863.1 NIV/BD/2008/RAJBARI	BD	0.00188857	0.00188857	0.00188857	0.00188857	0.00188857	0.00188857	0.00188857
JN808857.1 NIV/BD/2008/MANIKGONJ	BD	0.00188857	0.00188857	0.00188857	0.00188857	0.00188857	0.00188857	0.00188857	0
MK575061.1 NiV/BD/P.medius/EHA/2013/Raypur1402	BD	0	0	0	0	0	0	0	0.00188857	0.00188857
MK575060.1 NiV/BD/P.medius/EHA/2013/Raypur1401	BD	0	0	0	0	0	0	0	0.00188857	0.00188857	0
JN808864.1 NIV/BD/2010/FARIDPUR	BD	0	0	0	0	0	0	0	0.00188857	0.00188857	0	0
MK575068.1 NiV/BD/P.medius/EHA/2013/Raypur1410	BD	0	0	0	0	0	0	0	0.00188857	0.00188857	0	0	0
MK575070.1 NiV/BD/P.medius/EHA/2013/Sylhet191	BD	0	0	0	0	0	0	0	0.00188857	0.00188857	0	0	0	0
MK575069.1 NiV/BD/P.medius/EHA/2013/Raypur1411	BD	0	0	0	0	0	0	0	0.00188857	0.00188857	0	0	0	0	0
MH396625.1 NiV/India/HU/2018	India	0.0113314	0.0113314	0.0113314	0.0113314	0.0113314	0.0113314	0.0113314	0.0113314	0.0113314	0.0113314	0.0113314	0.0113314	0.0113314	0.0113314	0.0113314
MH523640.1 NiV/India/HU/2018	India	0.0113314	0.0113314	0.0113314	0.0113314	0.0113314	0.0113314	0.0113314	0.0113314	0.0113314	0.0113314	0.0113314	0.0113314	0.0113314	0.0113314	0.0113314	0
MH523641.1 NiV/India/HU/2018	India	0.0113314	0.0113314	0.0113314	0.0113314	0.0113314	0.0113314	0.0113314	0.0113314	0.0113314	0.0113314	0.0113314	0.0113314	0.0113314	0.0113314	0.0113314	0	0
NiV/India/Bat/2019/572-9	India	0.0103872	0.0103872	0.0103872	0.0103872	0.0103872	0.0103872	0.0103872	0.0103872	0.0103872	0.0103872	0.0103872	0.0103872	0.0103872	0.0103872	0.0103872	0.000944287	0.000944287	0.000944287
NiV/India/Bat/2019/574-6	India	0.0103872	0.0103872	0.0103872	0.0103872	0.0103872	0.0103872	0.0103872	0.0103872	0.0103872	0.0103872	0.0103872	0.0103872	0.0103872	0.0103872	0.0103872	0.000944287	0.000944287	0.000944287	0
NiV/India/Bat/2019/574-5	India	0.0116505	0.0116505	0.0116505	0.0116505	0.0116505	0.0116505	0.0116505	0.0116505	0.0116505	0.0116505	0.0116505	0.0116505	0.0116505	0.0116505	0.0116505	0.00194175	0.00194175	0.00194175	0.000970874	0.000970874
NiV/India/Bat/2019/574-4	India	0.0103627	0.0103627	0.0103627	0.0103627	0.0103627	0.0103627	0.0103627	0.0103627	0.0103627	0.0103627	0.0103627	0.0103627	0.0103627	0.0103627	0.0103627	0.00103627	0.00103627	0.00103627	0	0	0.00103627
NiV/India/Bat/2019/572-10	India	0.0105042	0.0105042	0.0105042	0.0105042	0.0105042	0.0105042	0.0105042	0.0105042	0.0105042	0.0105042	0.0105042	0.0105042	0.0105042	0.0105042	0.0105042	0.00105042	0.00105042	0.00105042	0	0	0	0
NiV/India/Bat/2019/43/7	India	0.0124611	0.0124611	0.0124611	0.0124611	0.0124611	0.0124611	0.0124611	0.0124611	0.0124611	0.0124611	0.0124611	0.0124611	0.0124611	0.0124611	0.0124611	0.00311526	0.00311526	0.00311526	0.00207684	0.00207684	0.00103842	0.00207684	0
NiV/India/Bat/2019/41/7	India	0.0103872	0.0103872	0.0103872	0.0103872	0.0103872	0.0103872	0.0103872	0.0103872	0.0103872	0.0103872	0.0103872	0.0103872	0.0103872	0.0103872	0.0103872	0.000944287	0.000944287	0.000944287	0	0	0.000970874	0	0	0.00207684
NiV/India/Bat/2019/572-6	India	0.019958	0.019958	0.019958	0.019958	0.019958	0.019958	0.019958	0.019958	0.019958	0.019958	0.019958	0.019958	0.019958	0.019958	0.019958	0.0105042	0.0105042	0.0105042	0.00945378	0.00945378	0.00945378	0.00945378	0.00945378	0.00945378	0.00945378
MH523642.1 NiV/India/HU/2018	India	0.0113314	0.0113314	0.0113314	0.0113314	0.0113314	0.0113314	0.0113314	0.0113314	0.0113314	0.0113314	0.0113314	0.0113314	0.0113314	0.0113314	0.0113314	0	0	0	0.000944287	0.000944287	0.00194175	0.00103627	0.00105042	0.00311526	0.000944287	0.0105042
NiV/India/Bat/2019/572-5	India	0.0105042	0.0105042	0.0105042	0.0105042	0.0105042	0.0105042	0.0105042	0.0105042	0.0105042	0.0105042	0.0105042	0.0105042	0.0105042	0.0105042	0.0105042	0.00105042	0.00105042	0.00105042	0	0	0	0	0	0	0	0.00945378	0.00105042
FJ513078.1 NiV/India/HU/2007/FG	India	0.00283286	0.00283286	0.00283286	0.00283286	0.00283286	0.00283286	0.00283286	0.000944287	0.000944287	0.00283286	0.00283286	0.00283286	0.00283286	0.00283286	0.00283286	0.0122757	0.0122757	0.0122757	0.0113314	0.0113314	0.0126214	0.011399	0.0115546	0.0134995	0.0113314	0.0210084	0.0122757	0.0115546
AF376747.1 NiV/MY/Pig/1999/VRI-0626	MY	0.0661001	0.0661001	0.0661001	0.0661001	0.0661001	0.0661001	0.0661001	0.0661001	0.0661001	0.0661001	0.0661001	0.0661001	0.0661001	0.0661001	0.0661001	0.0698772	0.0698772	0.0698772	0.068933	0.068933	0.0699029	0.0694301	0.0693277	0.0716511	0.068933	0.0787815	0.0698772	0.0693277	0.0670444
AJ627196.1 NV/MY/Pig/99/VRI-0626	MY	0.0651558	0.0651558	0.0651558	0.0651558	0.0651558	0.0651558	0.0651558	0.0651558	0.0651558	0.0651558	0.0651558	0.0651558	0.0651558	0.0651558	0.0651558	0.068933	0.068933	0.068933	0.0679887	0.0679887	0.068932	0.0683938	0.0682773	0.0706127	0.0679887	0.0777311	0.068933	0.0682773	0.0661001	0.00283286
AJ564622.1 NiV/MY/Pig/99/VRI-1413	MY	0.0661001	0.0661001	0.0661001	0.0661001	0.0661001	0.0661001	0.0661001	0.0661001	0.0661001	0.0661001	0.0661001	0.0661001	0.0661001	0.0661001	0.0661001	0.0698772	0.0698772	0.0698772	0.068933	0.068933	0.0699029	0.0694301	0.0693277	0.0716511	0.068933	0.0787815	0.0698772	0.0693277	0.0670444	0	0.00283286
AJ564621.1 NV/MY/Pig/99/VRI-2794	MY	0.0661001	0.0661001	0.0661001	0.0661001	0.0661001	0.0661001	0.0661001	0.0661001	0.0661001	0.0661001	0.0661001	0.0661001	0.0661001	0.0661001	0.0661001	0.0698772	0.0698772	0.0698772	0.068933	0.068933	0.0699029	0.0694301	0.0693277	0.0716511	0.068933	0.0787815	0.0698772	0.0693277	0.0670444	0	0.00283286	0
AJ564623.1 NiV/MY/Pig/99/UM-0128	MY	0.0661001	0.0661001	0.0661001	0.0661001	0.0661001	0.0661001	0.0661001	0.0661001	0.0661001	0.0661001	0.0661001	0.0661001	0.0661001	0.0661001	0.0661001	0.0698772	0.0698772	0.0698772	0.068933	0.068933	0.0699029	0.0694301	0.0693277	0.0716511	0.068933	0.0787815	0.0698772	0.0693277	0.0670444	0	0.00283286	0	0
AY029767.1 NiV/MY/HU/1999/UMMC1	MY	0.0661001	0.0661001	0.0661001	0.0661001	0.0661001	0.0661001	0.0661001	0.0661001	0.0661001	0.0661001	0.0661001	0.0661001	0.0661001	0.0661001	0.0661001	0.0698772	0.0698772	0.0698772	0.068933	0.068933	0.0699029	0.0694301	0.0693277	0.0716511	0.068933	0.0787815	0.0698772	0.0693277	0.0670444	0	0.00283286	0	0	0
KY425655.1 NiV/MY/HU/IRF0158	MY	0.0661001	0.0661001	0.0661001	0.0661001	0.0661001	0.0661001	0.0661001	0.0661001	0.0661001	0.0661001	0.0661001	0.0661001	0.0661001	0.0661001	0.0661001	0.0698772	0.0698772	0.0698772	0.068933	0.068933	0.0699029	0.0694301	0.0693277	0.0716511	0.068933	0.0787815	0.0698772	0.0693277	0.0670444	0	0.00283286	0	0	0	0
NC 002728.1 NiV/MY/HU/1999/CDC	MY	0.0661001	0.0661001	0.0661001	0.0661001	0.0661001	0.0661001	0.0661001	0.0661001	0.0661001	0.0661001	0.0661001	0.0661001	0.0661001	0.0661001	0.0661001	0.0698772	0.0698772	0.0698772	0.068933	0.068933	0.0699029	0.0694301	0.0693277	0.0716511	0.068933	0.0787815	0.0698772	0.0693277	0.0670444	0	0.00283286	0	0	0	0	0
KY425646.1 NiV/MY/HU/1999/IRF0160	MY	0.0661001	0.0661001	0.0661001	0.0661001	0.0661001	0.0661001	0.0661001	0.0661001	0.0661001	0.0661001	0.0661001	0.0661001	0.0661001	0.0661001	0.0661001	0.0698772	0.0698772	0.0698772	0.068933	0.068933	0.0699029	0.0694301	0.0693277	0.0716511	0.068933	0.0787815	0.0698772	0.0693277	0.0670444	0	0.00283286	0	0	0	0	0	0
AY029768.1 NiV/MY/HU/1999/UMMC2	MY	0.0661001	0.0661001	0.0661001	0.0661001	0.0661001	0.0661001	0.0661001	0.0661001	0.0661001	0.0661001	0.0661001	0.0661001	0.0661001	0.0661001	0.0661001	0.0698772	0.0698772	0.0698772	0.068933	0.068933	0.0699029	0.0694301	0.0693277	0.0716511	0.068933	0.0787815	0.0698772	0.0693277	0.0670444	0	0.00283286	0	0	0	0	0	0	0
FN869553 NiV/MY/Bat/2008/Perek	MY	0.0623229	0.0623229	0.0623229	0.0623229	0.0623229	0.0623229	0.0623229	0.0623229	0.0623229	0.0623229	0.0623229	0.0623229	0.0623229	0.0623229	0.0623229	0.0661001	0.0661001	0.0661001	0.0651558	0.0651558	0.0650485	0.0642487	0.0640756	0.066459	0.0651558	0.0735294	0.0661001	0.0640756	0.0632672	0.00566572	0.00472144	0.00566572	0.00566572	0.00566572	0.00566572	0.00566572	0.00566572	0.00566572	0.00566572

## Sheet: F gene
Nucleotide divergence for retrieved F gene sequences with respect to the F gene of of Nipah virus (Accession Number: AY988601.1)
	Genotype
MK575064.1 NiV/BD/P.medius/EHA/2013/Raypur1405	BD	0.00487508
MK575063.1 NiV/BD/P.medius/EHA/2013/Raypur1404	BD	0.00487508	0
MK575062.1 NiV/BD/P.medius/EHA/2013/Raypur1403	BD	0.00487508	0	0
MK575067.1 NiV/BD/P.medius/EHA/2013/Raypur1409	BD	0.00487508	0	0	0
MK575066.1 NiV/BD/P.medius/EHA/2013/Raypur1408	BD	0.00487508	0	0	0	0
MK575065.1 NiV/BD/P.medius/EHA/2013/Raypur1406	BD	0.00487508	0	0	0	0	0
JN808863.1 NIV/BD/2008/RAJBARI	BD	0.00975015	0.00853138	0.00853138	0.00853138	0.00853138	0.00853138	0.00853138
JN808857.1 NIV/BD/2008/MANIKGONJ	BD	0.00975015	0.00853138	0.00853138	0.00853138	0.00853138	0.00853138	0.00853138	0
MK575061.1 NiV/BD/P.medius/EHA/2013/Raypur1402	BD	0.00487508	0	0	0	0	0	0	0.00853138	0.00853138
MK575060.1 NiV/BD/P.medius/EHA/2013/Raypur1401	BD	0.00487508	0	0	0	0	0	0	0.00853138	0.00853138	0
JN808864.1 NIV/BD/2010/FARIDPUR	BD	0.00487508	0	0	0	0	0	0	0.00853138	0.00853138	0	0
MK575068.1 NiV/BD/P.medius/EHA/2013/Raypur1410	BD	0.00487508	0	0	0	0	0	0	0.00853138	0.00853138	0	0	0
MK575070.1 NiV/BD/P.medius/EHA/2013/Sylhet191	BD	0.00487508	0	0	0	0	0	0	0.00853138	0.00853138	0	0	0	0
MK575069.1 NiV/BD/P.medius/EHA/2013/Raypur1411	BD	0.00487508	0	0	0	0	0	0	0.00853138	0.00853138	0	0	0	0	0
MH396625.1 NiV/India/HU/2018	India	0.0164534	0.0152346	0.0152346	0.0152346	0.0152346	0.0152346	0.0152346	0.0188909	0.0188909	0.0152346	0.0152346	0.0152346	0.0152346	0.0152346	0.0152346
MH523640.1 NiV/India/HU/2018	India	0.0164534	0.0152346	0.0152346	0.0152346	0.0152346	0.0152346	0.0152346	0.0188909	0.0188909	0.0152346	0.0152346	0.0152346	0.0152346	0.0152346	0.0152346	0
MH523641.1 NiV/India/HU/2018	India	0.0164534	0.0152346	0.0152346	0.0152346	0.0152346	0.0152346	0.0152346	0.0188909	0.0188909	0.0152346	0.0152346	0.0152346	0.0152346	0.0152346	0.0152346	0	0
NiV/India/Bat/2019/572-9	India	0.0182815	0.0170628	0.0170628	0.0170628	0.0170628	0.0170628	0.0170628	0.0195003	0.0195003	0.0170628	0.0170628	0.0170628	0.0170628	0.0170628	0.0170628	0.00182815	0.00182815	0.00182815
NiV/India/Bat/2019/574-6	India	0.0191122	0.0178792	0.0178792	0.0178792	0.0178792	0.0178792	0.0178792	0.0203453	0.0203453	0.0178792	0.0178792	0.0178792	0.0178792	0.0178792	0.0178792	0.00308261	0.00308261	0.00308261	0.00493218
NiV/India/Bat/2019/574-5	India	0.0201097	0.0188909	0.0188909	0.0188909	0.0188909	0.0188909	0.0188909	0.0213285	0.0213285	0.0188909	0.0188909	0.0188909	0.0188909	0.0188909	0.0188909	0.00365631	0.00365631	0.00365631	0.00548446	0
NiV/India/Bat/2019/574-4	India	0.0201097	0.0188909	0.0188909	0.0188909	0.0188909	0.0188909	0.0188909	0.0213285	0.0213285	0.0188909	0.0188909	0.0188909	0.0188909	0.0188909	0.0188909	0.00365631	0.00365631	0.00365631	0.00548446	0	0
NiV/India/Bat/2019/572-10	India	0.0182815	0.0170628	0.0170628	0.0170628	0.0170628	0.0170628	0.0170628	0.0195003	0.0195003	0.0170628	0.0170628	0.0170628	0.0170628	0.0170628	0.0170628	0.00182815	0.00182815	0.00182815	0	0.00493218	0.00548446	0.00548446
NiV/India/Bat/2019/43/7	India	0.0188909	0.0176722	0.0176722	0.0176722	0.0176722	0.0176722	0.0176722	0.0188909	0.0188909	0.0176722	0.0176722	0.0176722	0.0176722	0.0176722	0.0176722	0.00243754	0.00243754	0.00243754	0.000609385	0.00431566	0.00487508	0.00487508	0.000609385
NiV/India/Bat/2019/41/7	India	0.0182815	0.0170628	0.0170628	0.0170628	0.0170628	0.0170628	0.0170628	0.0195003	0.0195003	0.0170628	0.0170628	0.0170628	0.0170628	0.0170628	0.0170628	0.00182815	0.00182815	0.00182815	0	0.00493218	0.00548446	0.00548446	0	0.000609385
NiV/India/Bat/2019/572-6	India	0.0160321	0.0160321	0.0160321	0.0160321	0.0160321	0.0160321	0.0160321	0.0187041	0.0187041	0.0160321	0.0160321	0.0160321	0.0160321	0.0160321	0.0160321	0.00133601	0.00133601	0.00133601	0	0.00473613	0.00534402	0.00534402	0	0.000668003	0
MH523642.1 NiV/India/HU/2018	India	0.0164534	0.0152346	0.0152346	0.0152346	0.0152346	0.0152346	0.0152346	0.0188909	0.0188909	0.0152346	0.0152346	0.0152346	0.0152346	0.0152346	0.0152346	0	0	0	0.00182815	0.00308261	0.00365631	0.00365631	0.00182815	0.00243754	0.00182815	0.00133601
NiV/India/Bat/2019/572-5	India	0.0182815	0.0170628	0.0170628	0.0170628	0.0170628	0.0170628	0.0170628	0.0195003	0.0195003	0.0170628	0.0170628	0.0170628	0.0170628	0.0170628	0.0170628	0.00182815	0.00182815	0.00182815	0	0.00493218	0.00548446	0.00548446	0	0.000609385	0	0	0.00182815
FJ513078.1 NiV/India/HU/2007/FG	India	0.00670323	0.00548446	0.00548446	0.00548446	0.00548446	0.00548446	0.00548446	0.00304692	0.00304692	0.00548446	0.00548446	0.00548446	0.00548446	0.00548446	0.00548446	0.0170628	0.0170628	0.0170628	0.0176722	0.0184957	0.0195003	0.0195003	0.0176722	0.0170628	0.0176722	0.0167001	0.0170628	0.0176722
AF376747.1 NiV/MY/Pig/1999/VRI-0626	MY	0.0658135	0.0645948	0.0645948	0.0645948	0.0645948	0.0645948	0.0645948	0.0670323	0.0670323	0.0645948	0.0645948	0.0645948	0.0645948	0.0645948	0.0645948	0.0664229	0.0664229	0.0664229	0.0670323	0.0678175	0.0682511	0.0682511	0.0670323	0.0664229	0.0670323	0.0681363	0.0664229	0.0670323	0.0652041
AJ627196.1 NV/MY/Pig/99/VRI-0626	MY	0.0664229	0.0652041	0.0652041	0.0652041	0.0652041	0.0652041	0.0652041	0.0676417	0.0676417	0.0652041	0.0652041	0.0652041	0.0652041	0.0652041	0.0652041	0.0670323	0.0670323	0.0670323	0.0676417	0.068434	0.0688605	0.0688605	0.0676417	0.0670323	0.0676417	0.0688043	0.0670323	0.0676417	0.0658135	0.00304692
AJ564622.1 NiV/MY/Pig/99/VRI-1413	MY	0.0652041	0.0639854	0.0639854	0.0639854	0.0639854	0.0639854	0.0639854	0.0664229	0.0664229	0.0639854	0.0639854	0.0639854	0.0639854	0.0639854	0.0639854	0.0658135	0.0658135	0.0658135	0.0664229	0.067201	0.0676417	0.0676417	0.0664229	0.0658135	0.0664229	0.0674683	0.0658135	0.0664229	0.0645948	0.000609385	0.00243754
AJ564621.1 NV/MY/Pig/99/VRI-2794	MY	0.0658135	0.0645948	0.0645948	0.0645948	0.0645948	0.0645948	0.0645948	0.0670323	0.0670323	0.0645948	0.0645948	0.0645948	0.0645948	0.0645948	0.0645948	0.0664229	0.0664229	0.0664229	0.0670323	0.0678175	0.0682511	0.0682511	0.0670323	0.0664229	0.0670323	0.0681363	0.0664229	0.0670323	0.0652041	0.00121877	0.00304692	0.000609385
AJ564623.1 NiV/MY/Pig/99/UM-0128	MY	0.0652041	0.0639854	0.0639854	0.0639854	0.0639854	0.0639854	0.0639854	0.0664229	0.0664229	0.0639854	0.0639854	0.0639854	0.0639854	0.0639854	0.0639854	0.0658135	0.0658135	0.0658135	0.0664229	0.067201	0.0676417	0.0676417	0.0664229	0.0658135	0.0664229	0.0674683	0.0658135	0.0664229	0.0645948	0.000609385	0.00243754	0	0.000609385
AY029767.1 NiV/MY/HU/1999/UMMC1	MY	0.0652041	0.0639854	0.0639854	0.0639854	0.0639854	0.0639854	0.0639854	0.0664229	0.0664229	0.0639854	0.0639854	0.0639854	0.0639854	0.0639854	0.0639854	0.0658135	0.0658135	0.0658135	0.0664229	0.067201	0.0676417	0.0676417	0.0664229	0.0658135	0.0664229	0.0674683	0.0658135	0.0664229	0.0645948	0.000609385	0.00243754	0	0.000609385	0
KY425655.1 NiV/MY/HU/IRF0158	MY	0.0652041	0.0639854	0.0639854	0.0639854	0.0639854	0.0639854	0.0639854	0.0664229	0.0664229	0.0639854	0.0639854	0.0639854	0.0639854	0.0639854	0.0639854	0.0658135	0.0658135	0.0658135	0.0664229	0.067201	0.0676417	0.0676417	0.0664229	0.0658135	0.0664229	0.0674683	0.0658135	0.0664229	0.0645948	0.000609385	0.00243754	0	0.000609385	0	0
NC 002728.1 NiV/MY/HU/1999/CDC	MY	0.0652041	0.0639854	0.0639854	0.0639854	0.0639854	0.0639854	0.0639854	0.0664229	0.0664229	0.0639854	0.0639854	0.0639854	0.0639854	0.0639854	0.0639854	0.0658135	0.0658135	0.0658135	0.0664229	0.067201	0.0676417	0.0676417	0.0664229	0.0658135	0.0664229	0.0674683	0.0658135	0.0664229	0.0645948	0.000609385	0.00243754	0	0.000609385	0	0	0
KY425646.1 NiV/MY/HU/1999/IRF0160	MY	0.0652041	0.0639854	0.0639854	0.0639854	0.0639854	0.0639854	0.0639854	0.0664229	0.0664229	0.0639854	0.0639854	0.0639854	0.0639854	0.0639854	0.0639854	0.0658135	0.0658135	0.0658135	0.0664229	0.067201	0.0676417	0.0676417	0.0664229	0.0658135	0.0664229	0.0674683	0.0658135	0.0664229	0.0645948	0.000609385	0.00243754	0	0.000609385	0	0	0	0
AY029768.1 NiV/MY/HU/1999/UMMC2	MY	0.0652041	0.0639854	0.0639854	0.0639854	0.0639854	0.0639854	0.0639854	0.0664229	0.0664229	0.0639854	0.0639854	0.0639854	0.0639854	0.0639854	0.0639854	0.0658135	0.0658135	0.0658135	0.0664229	0.067201	0.0676417	0.0676417	0.0664229	0.0658135	0.0664229	0.0674683	0.0658135	0.0664229	0.0645948	0.000609385	0.00243754	0	0.000609385	0	0	0	0	0
FN869553 NiV/MY/Bat/2008/Perek	MY	0.0652439	0.0640244	0.0640244	0.0640244	0.0640244	0.0640244	0.0640244	0.0664634	0.0664634	0.0640244	0.0640244	0.0640244	0.0640244	0.0640244	0.0640244	0.0658537	0.0658537	0.0658537	0.0664634	0.0678593	0.0682927	0.0682927	0.0664634	0.0658537	0.0664634	0.0675134	0.0658537	0.0664634	0.0646341	0.00670732	0.00853659	0.00609756	0.00670732	0.00609756	0.00609756	0.00609756	0.00609756	0.00609756	0.00609756

## Sheet: G gene
Nucleotide divergence for retrieved G gene sequences with respect to the G gene of of Nipah virus (Accession Number: AY988601.1)
	Genotype
MK575064.1 NiV/BD/P.medius/EHA/2013/Raypur1405	BD	0.00221117
MK575063.1 NiV/BD/P.medius/EHA/2013/Raypur1404	BD	0.00276396	0.000552792
MK575062.1 NiV/BD/P.medius/EHA/2013/Raypur1403	BD	0.00221117	0	0.000552792
MK575067.1 NiV/BD/P.medius/EHA/2013/Raypur1409	BD	0.00221117	0	0.000552792	0
MK575066.1 NiV/BD/P.medius/EHA/2013/Raypur1408	BD	0.00221117	0	0.000552792	0	0
MK575065.1 NiV/BD/P.medius/EHA/2013/Raypur1406	BD	0.00221117	0	0.000552792	0	0	0
JN808863.1 NIV/BD/2008/RAJBARI	BD	0.00386954	0.00608071	0.0066335	0.00608071	0.00608071	0.00608071	0.00608071
JN808857.1 NIV/BD/2008/MANIKGONJ	BD	0.00386954	0.00608071	0.0066335	0.00608071	0.00608071	0.00608071	0.00608071	0
MK575061.1 NiV/BD/P.medius/EHA/2013/Raypur1402	BD	0.00221117	0	0.000552792	0	0	0	0	0.00608071	0.00608071
MK575060.1 NiV/BD/P.medius/EHA/2013/Raypur1401	BD	0.00221117	0	0.000552792	0	0	0	0	0.00608071	0.00608071	0
JN808864.1 NIV/BD/2010/FARIDPUR	BD	0.00165837	0.00165837	0.00221117	0.00165837	0.00165837	0.00165837	0.00165837	0.00552792	0.00552792	0.00165837	0.00165837
MK575068.1 NiV/BD/P.medius/EHA/2013/Raypur1410	BD	0.00221117	0	0.000552792	0	0	0	0	0.00608071	0.00608071	0	0	0.00165837
MK575070.1 NiV/BD/P.medius/EHA/2013/Sylhet191	BD	0.00276396	0.000552792	0	0.000552792	0.000552792	0.000552792	0.000552792	0.0066335	0.0066335	0.000552792	0.000552792	0.00221117	0.000552792
MK575069.1 NiV/BD/P.medius/EHA/2013/Raypur1411	BD	0.00276396	0.000552792	0.00110558	0.000552792	0.000552792	0.000552792	0.000552792	0.0066335	0.0066335	0.000552792	0.000552792	0.00221117	0.000552792	0.00110558
MH396625.1 NiV/India/HU/2018	India	0.0182421	0.0204533	0.0210061	0.0204533	0.0204533	0.0204533	0.0204533	0.0176893	0.0176893	0.0204533	0.0204533	0.0199005	0.0204533	0.0210061	0.0210061
MH523640.1 NiV/India/HU/2018	India	0.0182421	0.0204533	0.0210061	0.0204533	0.0204533	0.0204533	0.0204533	0.0176893	0.0176893	0.0204533	0.0204533	0.0199005	0.0204533	0.0210061	0.0210061	0
MH523641.1 NiV/India/HU/2018	India	0.0182421	0.0204533	0.0210061	0.0204533	0.0204533	0.0204533	0.0204533	0.0176893	0.0176893	0.0204533	0.0204533	0.0199005	0.0204533	0.0210061	0.0210061	0	0
NiV/India/Bat/2019/572-9	India	0.0212899	0.0231684	0.0237946	0.0231684	0.0231684	0.0231684	0.0231684	0.0212899	0.0212899	0.0231684	0.0231684	0.0225423	0.0231684	0.0237946	0.0237946	0.00563557	0.00563557	0.00563557
NiV/India/Bat/2019/574-6	India	0.0183844	0.0206128	0.0211699	0.0206128	0.0206128	0.0206128	0.0206128	0.0178273	0.0178273	0.0206128	0.0206128	0.0200557	0.0206128	0.0211699	0.0211699	0.00222841	0.00222841	0.00222841	0.00442198
NiV/India/Bat/2019/574-5	India	0.0198675	0.0222757	0.0228778	0.0222757	0.0222757	0.0222757	0.0222757	0.0192655	0.0192655	0.0222757	0.0222757	0.0216737	0.0222757	0.0228778	0.0228778	0.00361228	0.00361228	0.00361228	0.00515464	0.00182149
NiV/India/Bat/2019/574-4	India	0.0188366	0.0210526	0.0216066	0.0210526	0.0210526	0.0210526	0.0210526	0.0182825	0.0182825	0.0210526	0.0210526	0.0204986	0.0210526	0.0216066	0.0216066	0.00277008	0.00277008	0.00277008	0.00376648	0.000558036	0.002414
NiV/India/Bat/2019/572-10	India	0.0207852	0.0230947	0.0236721	0.0230947	0.0230947	0.0230947	0.0230947	0.0202079	0.0202079	0.0230947	0.0230947	0.0225173	0.0230947	0.0236721	0.0236721	0.00461894	0.00461894	0.00461894	0.00063012	0.00349243	0.00484555	0.00289352
NiV/India/Bat/2019/43/7	India	0.0238257	0.0251872	0.0258679	0.0251872	0.0251872	0.0251872	0.0251872	0.0224643	0.0224643	0.0251872	0.0251872	0.0251872	0.0251872	0.0258679	0.0258679	0.00884956	0.00884956	0.00884956	0.00424028	0.00680735	0.00760194	0.00613915	0.00340368
NiV/India/Bat/2019/41/7	India	0.0210061	0.0232172	0.02377	0.0232172	0.0232172	0.0232172	0.0232172	0.0204533	0.0204533	0.0232172	0.0232172	0.0226645	0.0232172	0.02377	0.02377	0.00497512	0.00497512	0.00497512	0.000626174	0.00389972	0.00481638	0.0033241	0	0.00340368
NiV/India/Bat/2019/572-6	India	0.0228083	0.0242338	0.0249465	0.0242338	0.0242338	0.0242338	0.0242338	0.0228083	0.0228083	0.0242338	0.0242338	0.0242338	0.0242338	0.0249465	0.0249465	0.0085531	0.0085531	0.0085531	0.00356379	0.00641483	0.00578035	0.00641483	0.00358166	0.00773994	0.00356379
MH523642.1 NiV/India/HU/2018	India	0.0182421	0.0204533	0.0210061	0.0204533	0.0204533	0.0204533	0.0204533	0.0176893	0.0176893	0.0204533	0.0204533	0.0199005	0.0204533	0.0210061	0.0210061	0	0	0	0.00563557	0.00222841	0.00361228	0.00277008	0.00461894	0.00884956	0.00497512	0.0085531
NiV/India/Bat/2019/572-5	India	0.0210061	0.0232172	0.02377	0.0232172	0.0232172	0.0232172	0.0232172	0.0204533	0.0204533	0.0232172	0.0232172	0.0226645	0.0232172	0.02377	0.02377	0.00497512	0.00497512	0.00497512	0.000626174	0.00389972	0.00481638	0.0033241	0	0.00340368	0	0.00356379	0.00497512
FJ513078.1 NiV/India/HU/2007/FG	India	0.00386954	0.00608071	0.0066335	0.00608071	0.00608071	0.00608071	0.00608071	0.00442233	0.00442233	0.00608071	0.00608071	0.00552792	0.00608071	0.0066335	0.0066335	0.0199005	0.0199005	0.0199005	0.0237946	0.0200557	0.0216737	0.0204986	0.0225173	0.0251872	0.0226645	0.0256593	0.0199005	0.0226645
AF376747.1 NiV/MY/Pig/1999/VRI-0626	MY	0.0707573	0.0724157	0.0729685	0.0724157	0.0724157	0.0724157	0.0724157	0.0735213	0.0735213	0.0724157	0.0724157	0.0718629	0.0724157	0.0729685	0.0729685	0.0762852	0.0762852	0.0762852	0.0732624	0.0740947	0.0734497	0.0747922	0.0750577	0.0769231	0.076838	0.0762651	0.0762852	0.076838	0.0724157
AJ627196.1 NV/MY/Pig/99/VRI-0626	MY	0.0696517	0.0713101	0.0718629	0.0713101	0.0713101	0.0713101	0.0713101	0.0724157	0.0724157	0.0713101	0.0713101	0.0707573	0.0713101	0.0718629	0.0718629	0.0751797	0.0751797	0.0751797	0.07201	0.0729805	0.0722456	0.0736842	0.073903	0.0762423	0.0757324	0.0748396	0.0751797	0.0757324	0.0713101	0.00331675
AJ564622.1 NiV/MY/Pig/99/VRI-1413	MY	0.0696517	0.0713101	0.0718629	0.0713101	0.0713101	0.0713101	0.0713101	0.0724157	0.0724157	0.0713101	0.0713101	0.0707573	0.0713101	0.0718629	0.0718629	0.0751797	0.0751797	0.0751797	0.07201	0.0729805	0.0722456	0.0736842	0.073903	0.0755616	0.0757324	0.0748396	0.0751797	0.0757324	0.0713101	0.00110558	0.00221117
AJ564621.1 NV/MY/Pig/99/VRI-2794	MY	0.0702045	0.0718629	0.0724157	0.0718629	0.0718629	0.0718629	0.0718629	0.0729685	0.0729685	0.0718629	0.0718629	0.0713101	0.0718629	0.0724157	0.0724157	0.0757324	0.0757324	0.0757324	0.0726362	0.0735376	0.0728477	0.0742382	0.0744804	0.0762423	0.0762852	0.0755524	0.0757324	0.0762852	0.0718629	0.000552792	0.00276396	0.000552792
AJ564623.1 NiV/MY/Pig/99/UM-0128	MY	0.0702045	0.0718629	0.0724157	0.0718629	0.0718629	0.0718629	0.0718629	0.0729685	0.0729685	0.0718629	0.0718629	0.0713101	0.0718629	0.0724157	0.0724157	0.0757324	0.0757324	0.0757324	0.0726362	0.0735376	0.0728477	0.0742382	0.0744804	0.0762423	0.0762852	0.0755524	0.0757324	0.0762852	0.0718629	0.000552792	0.00276396	0.000552792	0
AY029767.1 NiV/MY/HU/1999/UMMC1	MY	0.0696517	0.0713101	0.0718629	0.0713101	0.0713101	0.0713101	0.0713101	0.0724157	0.0724157	0.0713101	0.0713101	0.0707573	0.0713101	0.0718629	0.0718629	0.0751797	0.0751797	0.0751797	0.07201	0.0729805	0.0722456	0.0736842	0.073903	0.0755616	0.0757324	0.0748396	0.0751797	0.0757324	0.0713101	0.00110558	0.00221117	0	0.000552792	0.000552792
KY425655.1 NiV/MY/HU/IRF0158	MY	0.0696517	0.0713101	0.0718629	0.0713101	0.0713101	0.0713101	0.0713101	0.0724157	0.0724157	0.0713101	0.0713101	0.0707573	0.0713101	0.0718629	0.0718629	0.0751797	0.0751797	0.0751797	0.07201	0.0729805	0.0722456	0.0736842	0.073903	0.0755616	0.0757324	0.0748396	0.0751797	0.0757324	0.0713101	0.00110558	0.00221117	0	0.000552792	0.000552792	0
NC 002728.1 NiV/MY/HU/1999/CDC	MY	0.0696517	0.0713101	0.0718629	0.0713101	0.0713101	0.0713101	0.0713101	0.0724157	0.0724157	0.0713101	0.0713101	0.0707573	0.0713101	0.0718629	0.0718629	0.0751797	0.0751797	0.0751797	0.07201	0.0729805	0.0722456	0.0736842	0.073903	0.0755616	0.0757324	0.0748396	0.0751797	0.0757324	0.0713101	0.00110558	0.00221117	0	0.000552792	0.000552792	0	0
KY425646.1 NiV/MY/HU/1999/IRF0160	MY	0.0696517	0.0713101	0.0718629	0.0713101	0.0713101	0.0713101	0.0713101	0.0724157	0.0724157	0.0713101	0.0713101	0.0707573	0.0713101	0.0718629	0.0718629	0.0751797	0.0751797	0.0751797	0.07201	0.0729805	0.0722456	0.0736842	0.073903	0.0755616	0.0757324	0.0748396	0.0751797	0.0757324	0.0713101	0.00110558	0.00221117	0	0.000552792	0.000552792	0	0	0
AY029768.1 NiV/MY/HU/1999/UMMC2	MY	0.0696517	0.0713101	0.0718629	0.0713101	0.0713101	0.0713101	0.0713101	0.0724157	0.0724157	0.0713101	0.0713101	0.0707573	0.0713101	0.0718629	0.0718629	0.0751797	0.0751797	0.0751797	0.07201	0.0729805	0.0722456	0.0736842	0.073903	0.0755616	0.0757324	0.0748396	0.0751797	0.0757324	0.0713101	0.00110558	0.00221117	0	0.000552792	0.000552792	0	0	0	0
FN869553 NiV/MY/Bat/2008/Perek	MY	0.0674406	0.0690989	0.0696517	0.0690989	0.0690989	0.0690989	0.0690989	0.0702045	0.0702045	0.0690989	0.0690989	0.0685462	0.0690989	0.0696517	0.0696517	0.0729685	0.0729685	0.0729685	0.0695053	0.0707521	0.0698374	0.0714681	0.0715935	0.0735194	0.0735213	0.0719886	0.0729685	0.0735213	0.0690989	0.00829187	0.00718629	0.00718629	0.00773908	0.00773908	0.00718629	0.00718629	0.00718629	0.00718629	0.00718629

## Sheet: L gene
Nucleotide divergence for retrieved L gene sequences with respect to the L gene of of Nipah virus (Accession Number: AY988601.1)
	Genotype
MK575064.1 NiV/BD/P.medius/EHA/2013/Raypur1405	BD	0.00326652
MK575063.1 NiV/BD/P.medius/EHA/2013/Raypur1404	BD	0.003415	0.000148478
MK575062.1 NiV/BD/P.medius/EHA/2013/Raypur1403	BD	0.00326652	0	0.000148478
MK575067.1 NiV/BD/P.medius/EHA/2013/Raypur1409	BD	0.00326652	0	0.000148478	0
MK575066.1 NiV/BD/P.medius/EHA/2013/Raypur1408	BD	0.00326652	0	0.000148478	0	0
MK575065.1 NiV/BD/P.medius/EHA/2013/Raypur1406	BD	0.00326652	0	0.000148478	0	0	0
JN808863.1 NIV/BD/2008/RAJBARI	BD	0.00786934	0.00876021	0.00890869	0.00876021	0.00876021	0.00876021	0.00876021
JN808857.1 NIV/BD/2008/MANIKGONJ	BD	0.00786934	0.00876021	0.00890869	0.00876021	0.00876021	0.00876021	0.00876021	0
MK575061.1 NiV/BD/P.medius/EHA/2013/Raypur1402	BD	0.00326652	0	0.000148478	0	0	0	0	0.00876021	0.00876021
MK575060.1 NiV/BD/P.medius/EHA/2013/Raypur1401	BD	0.003415	0.000148478	0.000296956	0.000148478	0.000148478	0.000148478	0.000148478	0.00890869	0.00890869	0.000148478
JN808864.1 NIV/BD/2010/FARIDPUR	BD	0.00237565	0.00118782	0.0013363	0.00118782	0.00118782	0.00118782	0.00118782	0.0081663	0.0081663	0.00118782	0.0013363
MK575068.1 NiV/BD/P.medius/EHA/2013/Raypur1410	BD	0.00326652	0	0.000148478	0	0	0	0	0.00876021	0.00876021	0	0.000148478	0.00118782
MK575070.1 NiV/BD/P.medius/EHA/2013/Sylhet191	BD	0.00386043	0.000593912	0.00074239	0.000593912	0.000593912	0.000593912	0.000593912	0.00935412	0.00935412	0.000593912	0.00074239	0.00178174	0.000593912
MK575069.1 NiV/BD/P.medius/EHA/2013/Raypur1411	BD	0.003415	0.000148478	0.000296956	0.000148478	0.000148478	0.000148478	0.000148478	0.00890869	0.00890869	0.000148478	0.000296956	0.0013363	0.000148478	0.00074239
MH396625.1 NiV/India/HU/2018	India	0.0179659	0.0182628	0.0184113	0.0182628	0.0182628	0.0182628	0.0182628	0.0160356	0.0160356	0.0182628	0.0184113	0.0176689	0.0182628	0.0188567	0.0184113
MH523640.1 NiV/India/HU/2018	India	0.0178174	0.0181143	0.0182628	0.0181143	0.0181143	0.0181143	0.0181143	0.0158872	0.0158872	0.0181143	0.0182628	0.0175204	0.0181143	0.0187082	0.0182628	0.000148478
MH523641.1 NiV/India/HU/2018	India	0.0178174	0.0181143	0.0182628	0.0181143	0.0181143	0.0181143	0.0181143	0.0158872	0.0158872	0.0181143	0.0182628	0.0175204	0.0181143	0.0187082	0.0182628	0.000148478	0
NiV/India/Bat/2019/572-9	India	0.019062	0.019062	0.0192133	0.019062	0.019062	0.019062	0.019062	0.0170953	0.0170953	0.019062	0.0192133	0.0184569	0.019062	0.0196672	0.0192133	0.00332829	0.003177	0.003177
NiV/India/Bat/2019/574-6	India	0.0186249	0.0190905	0.0192457	0.0190905	0.0190905	0.0190905	0.0190905	0.0166072	0.0166072	0.0190905	0.0192457	0.0184697	0.0190905	0.0197113	0.0192457	0.00294894	0.00279373	0.00279373	0.00375293
NiV/India/Bat/2019/574-5	India	0.0186839	0.0188492	0.0190146	0.0188492	0.0188492	0.0188492	0.0188492	0.0168651	0.0168651	0.0188492	0.0190146	0.0183532	0.0188492	0.0193452	0.0190146	0.00231481	0.00214947	0.00214947	0.00347222	0.000839208
NiV/India/Bat/2019/574-4	India	0.0176951	0.0179976	0.0181488	0.0179976	0.0179976	0.0179976	0.0179976	0.0161827	0.0161827	0.0179976	0.0181488	0.0173926	0.0179976	0.0186025	0.0181488	0.00241984	0.0022686	0.0022686	0.00335059	0.00062315	0.000165344
NiV/India/Bat/2019/572-10	India	0.0195496	0.0195496	0.019706	0.0195496	0.0195496	0.0195496	0.0195496	0.0176728	0.0176728	0.0195496	0.019706	0.018924	0.0195496	0.0201752	0.019706	0.00359712	0.00344073	0.00344073	0.000316857	0.00438098	0.00380354	0.00397141
NiV/India/Bat/2019/43/7	India	0.0228861	0.0225367	0.0227114	0.0225367	0.0225367	0.0225367	0.0225367	0.0202655	0.0202655	0.0225367	0.0227114	0.0220126	0.0225367	0.0230608	0.0227114	0.0059399	0.0057652	0.0057652	0.00366876	0.0059399	0.00611567	0.00611461	0.00401817
NiV/India/Bat/2019/41/7	India	0.0188567	0.0188567	0.0190052	0.0188567	0.0188567	0.0188567	0.0188567	0.0169265	0.0169265	0.0188567	0.0190052	0.0182628	0.0188567	0.0194506	0.0190052	0.00356347	0.003415	0.003415	0.000302572	0.00419059	0.00380291	0.003781	0.00046919	0.00401817
NiV/India/Bat/2019/572-6	India	0.020709	0.0205224	0.020709	0.0205224	0.0205224	0.0205224	0.0205224	0.0179104	0.0179104	0.0205224	0.020709	0.0201493	0.0205224	0.0212687	0.020709	0.00391791	0.00373134	0.00373134	0.000933184	0.00412681	0.00397727	0.00429185	0.0011194	0.00384246	0.00130597
MH523642.1 NiV/India/HU/2018	India	0.0178174	0.0181143	0.0182628	0.0181143	0.0181143	0.0181143	0.0181143	0.0158872	0.0158872	0.0181143	0.0182628	0.0175204	0.0181143	0.0187082	0.0182628	0.000148478	0	0	0.003177	0.00279373	0.00214947	0.0022686	0.00344073	0.0057652	0.003415	0.00373134
NiV/India/Bat/2019/572-5	India	0.0190052	0.0190052	0.0191537	0.0190052	0.0190052	0.0190052	0.0190052	0.017075	0.017075	0.0190052	0.0191537	0.0184113	0.0190052	0.0195991	0.0191537	0.003415	0.00326652	0.00326652	0.000151286	0.00403539	0.00363757	0.00362976	0.000312793	0.00384347	0.000148478	0.0011194	0.00326652
FJ513078.1 NiV/India/HU/2007/FG	India	0.00697847	0.00786934	0.00801782	0.00786934	0.00786934	0.00786934	0.00786934	0.00282108	0.00282108	0.00786934	0.00801782	0.00727543	0.00786934	0.00846325	0.00801782	0.0158872	0.0157387	0.0157387	0.016944	0.016452	0.0168651	0.0160315	0.0176728	0.0204403	0.016778	0.0182836	0.0157387	0.0169265
AF376747.1 NiV/MY/Pig/1999/VRI-0626	MY	?	?	?	?	?	?	?	?	?	?	?	?	?	?	?	?	?	?	?	?	?	?	?	?	?	?	?	?	?
AJ627196.1 NV/MY/Pig/99/VRI-0626	MY	0.0662212	0.0671121	0.0672606	0.0671121	0.0671121	0.0671121	0.0671121	0.0653304	0.0653304	0.0671121	0.0672606	0.0668151	0.0671121	0.067706	0.0672606	0.0678545	0.067706	0.067706	0.0686838	0.0687568	0.0701058	0.0685118	0.0683453	0.0733753	0.0675575	0.0692164	0.067706	0.067706	0.0648849	?
AJ564622.1 NiV/MY/Pig/99/VRI-1413	MY	0.0653304	0.0662212	0.0663697	0.0662212	0.0662212	0.0662212	0.0662212	0.0644395	0.0644395	0.0662212	0.0663697	0.0659243	0.0662212	0.0668151	0.0663697	0.0669636	0.0668151	0.0668151	0.0676248	0.0676703	0.0691138	0.0674531	0.0675633	0.072327	0.0666667	0.0682836	0.0668151	0.0668151	0.0639941	?	0.00193022
AJ564621.1 NV/MY/Pig/99/VRI-2794	MY	0.0654788	0.0663697	0.0665182	0.0663697	0.0663697	0.0663697	0.0663697	0.064588	0.064588	0.0663697	0.0665182	0.0660728	0.0663697	0.0669636	0.0665182	0.0671121	0.0669636	0.0669636	0.0677761	0.0678255	0.0692791	0.0676044	0.0677197	0.0725017	0.0668151	0.0682836	0.0669636	0.0669636	0.0641425	?	0.00163326	0.000296956
AJ564623.1 NiV/MY/Pig/99/UM-0128	MY	0.0656273	0.0665182	0.0666667	0.0665182	0.0665182	0.0665182	0.0665182	0.0647365	0.0647365	0.0665182	0.0666667	0.0662212	0.0665182	0.0671121	0.0666667	0.0672606	0.0671121	0.0671121	0.0679274	0.0679808	0.0694444	0.0677556	0.0678761	0.0726765	0.0669636	0.0682836	0.0671121	0.0671121	0.064291	?	0.00178174	0.000445434	0.000148478
AY029767.1 NiV/MY/HU/1999/UMMC1	MY	0.0654788	0.0663697	0.0665182	0.0663697	0.0663697	0.0663697	0.0663697	0.064588	0.064588	0.0663697	0.0665182	0.0660728	0.0663697	0.0669636	0.0665182	0.0671121	0.0669636	0.0669636	0.0677761	0.0678255	0.0692791	0.0676044	0.0677197	0.0725017	0.0668151	0.0682836	0.0669636	0.0669636	0.0641425	?	0.00163326	0.000296956	0	0.000148478
KY425655.1 NiV/MY/HU/IRF0158	MY	0.0654788	0.0663697	0.0665182	0.0663697	0.0663697	0.0663697	0.0663697	0.064588	0.064588	0.0663697	0.0665182	0.0660728	0.0663697	0.0669636	0.0665182	0.0671121	0.0669636	0.0669636	0.0677761	0.0678255	0.0692791	0.0676044	0.0677197	0.0725017	0.0668151	0.0682836	0.0669636	0.0669636	0.0641425	?	0.00178174	0.000148478	0.000148478	0.000296956	0.000148478
NC 002728.1 NiV/MY/HU/1999/CDC	MY	0.0654788	0.0663697	0.0665182	0.0663697	0.0663697	0.0663697	0.0663697	0.064588	0.064588	0.0663697	0.0665182	0.0660728	0.0663697	0.0669636	0.0665182	0.0671121	0.0669636	0.0669636	0.0677761	0.0678255	0.0692791	0.0676044	0.0677197	0.0725017	0.0668151	0.0682836	0.0669636	0.0669636	0.0641425	?	0.00178174	0.000148478	0.000148478	0.000296956	0.000148478	0
KY425646.1 NiV/MY/HU/1999/IRF0160	MY	0.0654788	0.0663697	0.0665182	0.0663697	0.0663697	0.0663697	0.0663697	0.064588	0.064588	0.0663697	0.0665182	0.0660728	0.0663697	0.0669636	0.0665182	0.0671121	0.0669636	0.0669636	0.0677761	0.0678255	0.0692791	0.0676044	0.0677197	0.0725017	0.0668151	0.0682836	0.0669636	0.0669636	0.0641425	?	0.00178174	0.000148478	0.000148478	0.000296956	0.000148478	0	0
AY029768.1 NiV/MY/HU/1999/UMMC2	MY	0.0656273	0.0665182	0.0666667	0.0665182	0.0665182	0.0665182	0.0665182	0.0647365	0.0647365	0.0665182	0.0666667	0.0662212	0.0665182	0.0671121	0.0666667	0.0672606	0.0671121	0.0671121	0.0679274	0.0679808	0.0694444	0.0677556	0.0678761	0.0726765	0.0669636	0.0682836	0.0671121	0.0671121	0.064291	?	0.00193022	0.000296956	0.000296956	0.000445434	0.000296956	0.000148478	0.000148478	0.000148478
FN869553 NiV/MY/Bat/2008/Perek	MY	0.0662311	0.0671221	0.0672706	0.0671221	0.0671221	0.0671221	0.0671221	0.0653401	0.0653401	0.0671221	0.0672706	0.0668251	0.0671221	0.0677161	0.0672706	0.0678646	0.0677161	0.0677161	0.0686942	0.0687675	0.0701174	0.0685222	0.068356	0.0733881	0.0675676	0.0692293	0.0677161	0.0677161	0.0648946	?	0	0.0019305	0.0016335	0.001782	0.0016335	0.001782	0.001782	0.001782	0.0019305
